# Supplementary material
Source: PubMed Central journal article supplement (PMC5071145)
Supplement: NIHMS805744-supplement-01.pdf [file NIHMS805744-supplement-01.pdf]

## Computer-assisted $^1\text{H}$ NMR Analysis of the anti-Tuberculosis Drug Lead Ecumicin

Wei Gao,<sup>a,b</sup> José G. Napolitano,<sup>a</sup> David C. Lankin,<sup>a</sup> Jin-Yong Kim,<sup>c,d</sup> Ying-Yu Jing,<sup>c</sup> Hanki Lee,<sup>c,d</sup> Joo-Won Suh,<sup>c,d</sup> Shao-Nong Chena<sup>b</sup> and Guido F. Paulia<sup>b\*</sup>

---

<sup>a</sup> Department of Medicinal Chemistry and Pharmacognosy, College of Pharmacy, University of Illinois at Chicago, Chicago, IL 60612, U.S.A.

<sup>b</sup> Institute for Tuberculosis Research, College of Pharmacy, University of Illinois at Chicago, Chicago, IL 60612, U.S.A.

<sup>c</sup> Division of Bioscience and Bioinformatics, College of Natural Science, Myongji University, Cheoin-gu, Yongin, Gyeonggi-Do, 17058, South Korea

<sup>d</sup> Center for Nutraceutical and Pharmaceutical Materials, Myongji University, Cheoin-gu, Yongin, Gyeonggi-Do, 17058, South Korea



|           |   |          |       |        |             |              |                 |                 |              |
|-----------|---|----------|-------|--------|-------------|--------------|-----------------|-----------------|--------------|
| 10TrpH3B/ | 1 | 3.693816 | 1*1*1 | STAT=Y | PRED= 3.367 | RANGE= 0.629 | WIDTH(Y)= 2.091 | RESP(Y)= 0.2077 | HSQC= C66    |
| 10Trp_H5/ | 1 | 6.698366 | 1*1*1 | STAT=Y | PRED= 6.772 | RANGE= 0.276 | WIDTH(Y)= 1.646 | RESP(Y)= 0.2387 | HSQC= C68    |
| 10Trp_H9/ | 1 | 6.441818 | 1*1*1 | STAT=Y | PRED= 7.089 | RANGE= 0.219 | WIDTH(Y)= 1.124 | RESP(Y)= 0.2512 | HSQC= C73    |
| 10Trp_H7/ | 1 | 6.918046 | 1*1*1 | STAT=Y | PRED= 7.333 | RANGE= 0.309 | WIDTH(Y)= 0.720 | RESP(Y)= 0.2360 | HSQC= C75    |
| 10TrpH12/ | 1 | 3.825512 | 1*1*3 | STAT=Y | PRED= 4.072 | RANGE= 0.249 | WIDTH(Y)= 1.239 | RESP(Y)= 0.2230 | HSQC= C77    |
| 11Val_H2/ | 1 | 4.528574 | 1*1*1 | STAT=Y | PRED= 4.303 | RANGE= 1.449 | WIDTH(Y)= 1.881 | RESP(Y)= 0.2193 | HSQC= C80    |
| 11Val_H3/ | 1 | 2.200073 | 1*1*1 | STAT=Y | PRED= 2.094 | RANGE= 0.589 | WIDTH(Y)= 1.787 | RESP(Y)= 0.2038 | HSQC= C81    |
| 11Val_H4/ | 1 | 1.028232 | 1*1*3 | STAT=Y | PRED= 1.094 | RANGE= 0.249 | WIDTH(Y)= 2.114 | RESP(Y)= 0.2186 | HSQC= C82    |
| 11Val_H5/ | 1 | 0.989110 | 1*1*3 | STAT=Y | PRED= 1.080 | RANGE= 0.299 | WIDTH(Y)= 1.810 | RESP(Y)= 0.1543 | HSQC= C83    |
| 12Phe_H2/ | 1 | 4.853685 | 1*1*1 | STAT=Y | PRED= 4.499 | RANGE= 0.989 | WIDTH(Y)= 1.248 | RESP(Y)= 0.1976 | HSQC= C86    |
| 12Phe_H3/ | 1 | 5.343836 | 1*1*1 | STAT=Y | PRED= 5.208 | RANGE= 0.489 | WIDTH(Y)= 1.873 | RESP(Y)= 0.2247 | HSQC= C87    |
| 12Phe_H5/ | 1 | 7.239580 | 1*2*1 | STAT=Y | PRED= 7.524 | RANGE= 0.309 | WIDTH(Y)= 2.159 | RESP(Y)= 0.2433 | HSQC= C89_93 |
| 12Phe_H6/ | 1 | 7.255476 | 1*2*1 | STAT=Y | PRED= 7.372 | RANGE= 0.579 | WIDTH(Y)= 1.167 | RESP(Y)= 0.2391 | HSQC= C90_92 |
| 12Phe_H7/ | 1 | 7.200628 | 1*1*1 | STAT=Y | PRED= 7.281 | RANGE= 0.309 | WIDTH(Y)= 1.552 | RESP(Y)= 0.2565 | HSQC= C91    |
| 13Val_H2/ | 1 | 4.396075 | 1*1*1 | STAT=Y | PRED= 4.169 | RANGE= 0.669 | WIDTH(Y)= 1.198 | RESP(Y)= 0.2136 | HSQC= C97    |
| 13Val_H3/ | 1 | 1.967770 | 1*1*1 | STAT=Y | PRED= 1.935 | RANGE= 0.869 | WIDTH(Y)= 1.937 | RESP(Y)= 0.2420 | HSQC= C99    |
| 13Val_H4/ | 1 | 0.934957 | 1*1*3 | STAT=Y | PRED= 1.277 | RANGE= 0.219 | WIDTH(Y)= 2.639 | RESP(Y)= 0.2817 | HSQC= C100   |
| 13Val_H5/ | 1 | 0.919351 | 1*1*3 | STAT=Y | PRED= 0.933 | RANGE= 0.278 | WIDTH(Y)= 2.019 | RESP(Y)= 0.2636 | HSQC= C101   |

COUPLING CONSTANTS(HZ):

|          |          |   |          |          |        |               |              |
|----------|----------|---|----------|----------|--------|---------------|--------------|
| J115_217 | 7.7949   | J | 10Trp_H8 | 10Trp_H9 | STAT=Y | PRED= 8.100   | RANGE= 0.890 |
| J115_218 | 8.1831   | J | 10Trp_H8 | 10Trp_H7 | STAT=Y | PRED= 7.850   | RANGE= 0.800 |
| J122_123 | 9.1830   | J | 01Val_H2 | 01Val_H3 | STAT=Y | PRED= 12.510  | RANGE= 4.000 |
| J123_124 | 6.5874   | J | 01Val_H3 | 01Val_H6 | STAT=Y | PRED= 6.640   | RANGE= 0.200 |
| J123_127 | 6.6158   | J | 01Val_H3 | 01Val_H7 | STAT=Y | PRED= 6.640   | RANGE= 0.200 |
| J131_132 | 8.7551   | J | 02Val_H2 | 02Val_H3 | STAT=Y | PRED= 12.600  | RANGE= 6.000 |
| J132_133 | 6.7883   | J | 02Val_H3 | 02Val_H4 | STAT=Y | PRED= 6.640   | RANGE= 0.200 |
| J132_136 | 6.7203   | J | 02Val_H3 | 02Val_H5 | STAT=Y | PRED= 6.640   | RANGE= 0.200 |
| J142_143 | 11.2368  | J | 03Ile_H2 | 03Ile_H3 | STAT=Y | PRED= 13.150  | RANGE= 4.000 |
| J143_144 | 1.5555   | J | 03Ile_H3 | 03IleH4A | STAT=Y | PRED= 1.950   | RANGE= 3.000 |
| J143_145 | 3.3192   | J | 03Ile_H3 | 03IleH4B | STAT=Y | PRED= 12.660  | RANGE= 2.800 |
| J143_146 | 6.6322   | J | 03Ile_H3 | 03Ile_H6 | STAT=Y | PRED= 6.640   | RANGE= 0.200 |
| J144_145 | -12.9087 | J | 03IleH4A | 03IleH4B | STAT=Y | PRED= -13.400 | RANGE= 0.600 |
| J144_149 | 7.2572   | J | 03IleH4A | 03Ile_H5 | STAT=Y | PRED= 7.440   | RANGE= 0.150 |
| J145_149 | 7.6370   | J | 03IleH4B | 03Ile_H5 | STAT=Y | PRED= 7.440   | RANGE= 0.150 |
| J153_154 | 2.3441   | J | 04Thr_H2 | 04Thr_H3 | STAT=Y | PRED= 2.690   | RANGE= 6.600 |
| J154_155 | 6.5142   | J | 04Thr_H3 | 04Thr_H4 | STAT=Y | PRED= 6.250   | RANGE= 0.600 |
| J161_162 | 3.7286   | J | 05Thr_H2 | 05Thr_H3 | STAT=Y | PRED= 2.440   | RANGE= 4.400 |
| J162_164 | 6.4627   | J | 05Thr_H3 | 05Thr_H4 | STAT=Y | PRED= 6.250   | RANGE= 0.600 |
| J168_169 | 8.9241   | J | 06Val_H2 | 06Val_H3 | STAT=Y | PRED= 2.980   | RANGE= 6.600 |
| J169_170 | 6.6943   | J | 06Val_H3 | 06Val_H4 | STAT=Y | PRED= 6.640   | RANGE= 0.200 |
| J169_173 | 7.0127   | J | 06Val_H3 | 06Val_H5 | STAT=Y | PRED= 6.640   | RANGE= 0.200 |
| J179_180 | 8.5788   | J | 07Leu_H2 | 07LeuH3A | STAT=Y | PRED= 3.040   | RANGE= 6.000 |
| J179_181 | 6.5941   | J | 07Leu_H2 | 07LeuH3B | STAT=Y | PRED= 13.950  | RANGE= 4.000 |
| J180_181 | -13.5581 | J | 07LeuH3A | 07LeuH3B | STAT=Y | PRED= -14.710 | RANGE= 1.600 |
| J180_182 | 5.4402   | J | 07LeuH3A | 07Leu_H4 | STAT=Y | PRED= 12.990  | RANGE= 2.560 |
| J181_182 | 7.9864   | J | 07LeuH3B | 07Leu_H4 | STAT=Y | PRED= 2.270   | RANGE= 3.000 |
| J182_183 | 6.5528   | J | 07Leu_H4 | 07Leu_H5 | STAT=Y | PRED= 6.640   | RANGE= 0.200 |
| J182_186 | 6.5909   | J | 07Leu_H4 | 07Leu_H6 | STAT=Y | PRED= 6.640   | RANGE= 0.200 |
| J190_191 | 8.8837   | J | 08Val_H2 | 08Val_H3 | STAT=Y | PRED= 12.880  | RANGE= 6.000 |
| J191_192 | 6.5495   | J | 08Val_H3 | 08Val_H4 | STAT=Y | PRED= 6.640   | RANGE= 0.200 |
| J191_195 | 6.7835   | J | 08Val_H3 | 08Val_H5 | STAT=Y | PRED= 6.640   | RANGE= 0.200 |
| J201_202 | 7.6228   | J | 09Val_H2 | 09Val_H3 | STAT=Y | PRED= 12.960  | RANGE= 4.000 |
| J202_203 | 6.4970   | J | 09Val_H3 | 09Val_H4 | STAT=Y | PRED= 6.640   | RANGE= 0.200 |
| J202_206 | 6.8287   | J | 09Val_H3 | 09Val_H5 | STAT=Y | PRED= 6.640   | RANGE= 0.200 |
| J212_213 | 11.1639  | J | 10Trp_H2 | 10TrpH3A | STAT=Y | PRED= 12.890  | RANGE= 4.000 |
| J212_214 | 4.7143   | J | 10Trp_H2 | 10TrpH3B | STAT=Y | PRED= 1.900   | RANGE= 4.400 |
| J213_214 | -13.7268 | J | 10TrpH3A | 10TrpH3B | STAT=Y | PRED= -16.760 | RANGE= 2.560 |

|          |        |   |          |          |        |              |              |
|----------|--------|---|----------|----------|--------|--------------|--------------|
| J215_218 | 0.4848 | J | 10Trp_H5 | 10Trp_H7 | STAT=Y | PRED= -0.300 | RANGE= 0.500 |
| J217_218 | 0.6721 | J | 10Trp_H9 | 10Trp_H7 | STAT=Y | PRED= 1.020  | RANGE= 1.200 |
| J223_224 | 7.9107 | J | 11Val_H2 | 11Val_H3 | STAT=Y | PRED= 3.450  | RANGE= 9.000 |
| J224_225 | 6.7500 | J | 11Val_H3 | 11Val_H4 | STAT=Y | PRED= 6.640  | RANGE= 0.200 |
| J224_228 | 6.8020 | J | 11Val_H3 | 11Val_H5 | STAT=Y | PRED= 6.640  | RANGE= 0.200 |
| J232_233 | 1.8995 | J | 12Phe_H2 | 12Phe_H3 | STAT=Y | PRED= 1.900  | RANGE= 6.600 |
| J234_238 | 1.3331 | J | 12Phe_H5 | 12Phe_H5 | STAT=Y | PRED= 1.980  | RANGE= 1.200 |
| J234_235 | 7.6508 | J | 12Phe_H5 | 12Phe_H6 | STAT=Y | PRED= 7.660  | RANGE= 0.340 |
| J234_237 | 0.7591 | J | 12Phe_H6 | 12Phe_H5 | STAT=Y | PRED= 0.550  | RANGE= 0.750 |
| J234_236 | 1.2534 | J | 12Phe_H5 | 12Phe_H7 | STAT=Y | PRED= 1.260  | RANGE= 1.200 |
| J235_237 | 1.7067 | J | 12Phe_H6 | 12Phe_H6 | STAT=Y | PRED= 1.480  | RANGE= 1.200 |
| J235_236 | 7.4723 | J | 12Phe_H6 | 12Phe_H7 | STAT=Y | PRED= 7.400  | RANGE= 0.240 |
| J241_242 | 8.8995 | J | 13Val_H2 | 13Val_H3 | STAT=Y | PRED= 12.320 | RANGE= 6.000 |
| J242_243 | 6.8280 | J | 13Val_H3 | 13Val_H4 | STAT=Y | PRED= 6.640  | RANGE= 0.200 |
| J242_246 | 6.4124 | J | 13Val_H3 | 13Val_H5 | STAT=Y | PRED= 6.640  | RANGE= 0.200 |

CONTROL PARAMETERS:

Solvent = none (def. 99% enriched)  
 1.000 = Concentration (vol%, def=1.0%)  
 0.00100000 = Minimum line-intensity  
 0.00100000 = Diagonalization criterium (not in use)  
 11.63298470 = Left frequency (ppm)  
 -4.33373638 = Right frequency (ppm)  
 10.000 = Acquisition time (s, for QMILS)  
 0.000 = Line-width (for modes D, P & T, 0=use defaults)  
 0.103379714 = Data-point resolution (Hz)  
 27.781 = GAUSSIAN (% , 0=use default from INF)  
 -9.448 = Dispersion contribution (% , 0=use default from INF)  
 0.00000000 = Decoupling frequency (for DORES)

CONSTRAINTS (in equations X0 = 1.0)...use no empty lines

EQUAL 01Val\_H2 = 13Val\_H2  
 EQUAL 06Val\_H5 = 11Val\_H4  
 EQUAL 07Leu\_H5 = 07Leu\_H6  
 IGNORE(HZ): 940.350 to 936.356  
 IGNORE(HZ): 2062.779 to 2027.293  
 IGNORE(HZ): 1175.285 to 1149.842  
 IGNORE(HZ): 1232.768 to 1209.210  
 IGNORE(HZ): 5188.061 to 5161.182  
 IGNORE(HZ): 4803.141 to 4787.420  
 IGNORE(HZ): 812.060 to 780.231

END of FILE

**Supporting Figure 1.** The HiFSA fingerprint of ecumicin (**1**) calculated at 4 GHz demonstrates that presently unattainable NMR magnetic fields will be required to achieve a near first order  $^1\text{H}$  NMR spectrum, suitable for visual analysis of this oligopeptide.

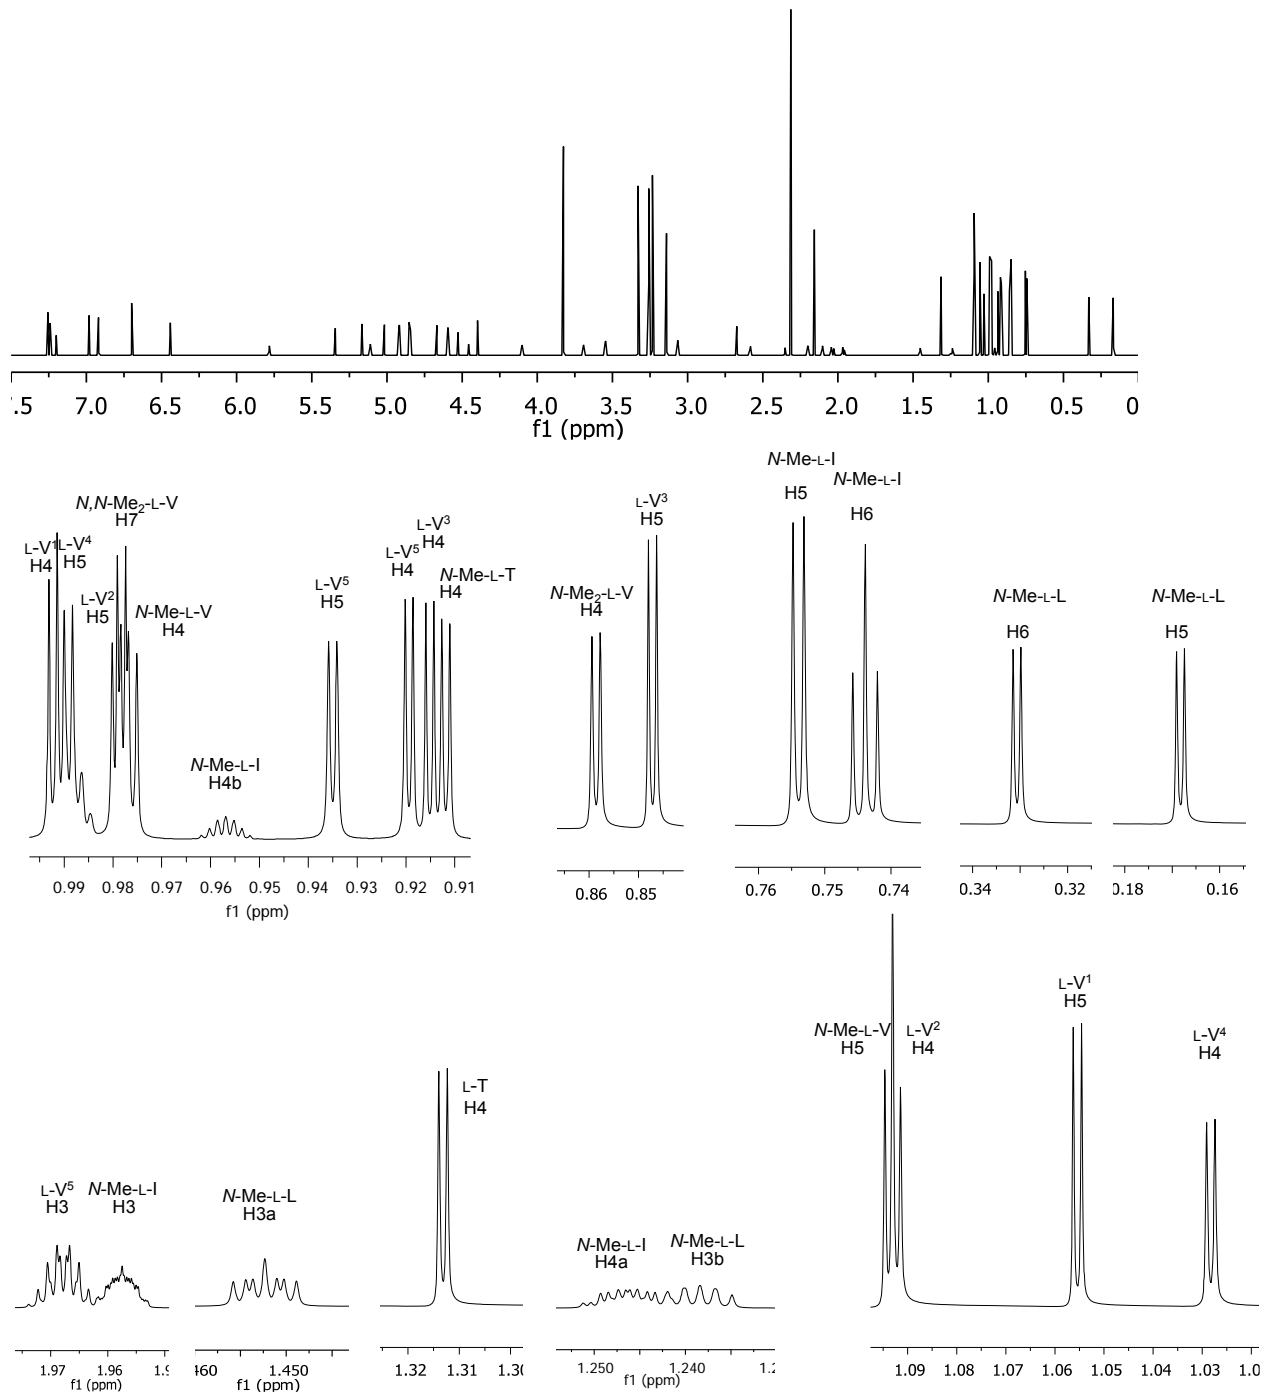



**Supporting Figure 2.** Comparison of the HiFSA fingerprint of ecumicin (**1**) calculated at 900 MHz (black) to the 900MHz experimental spectrum (blue) with expansions. RMS = 0.104%.

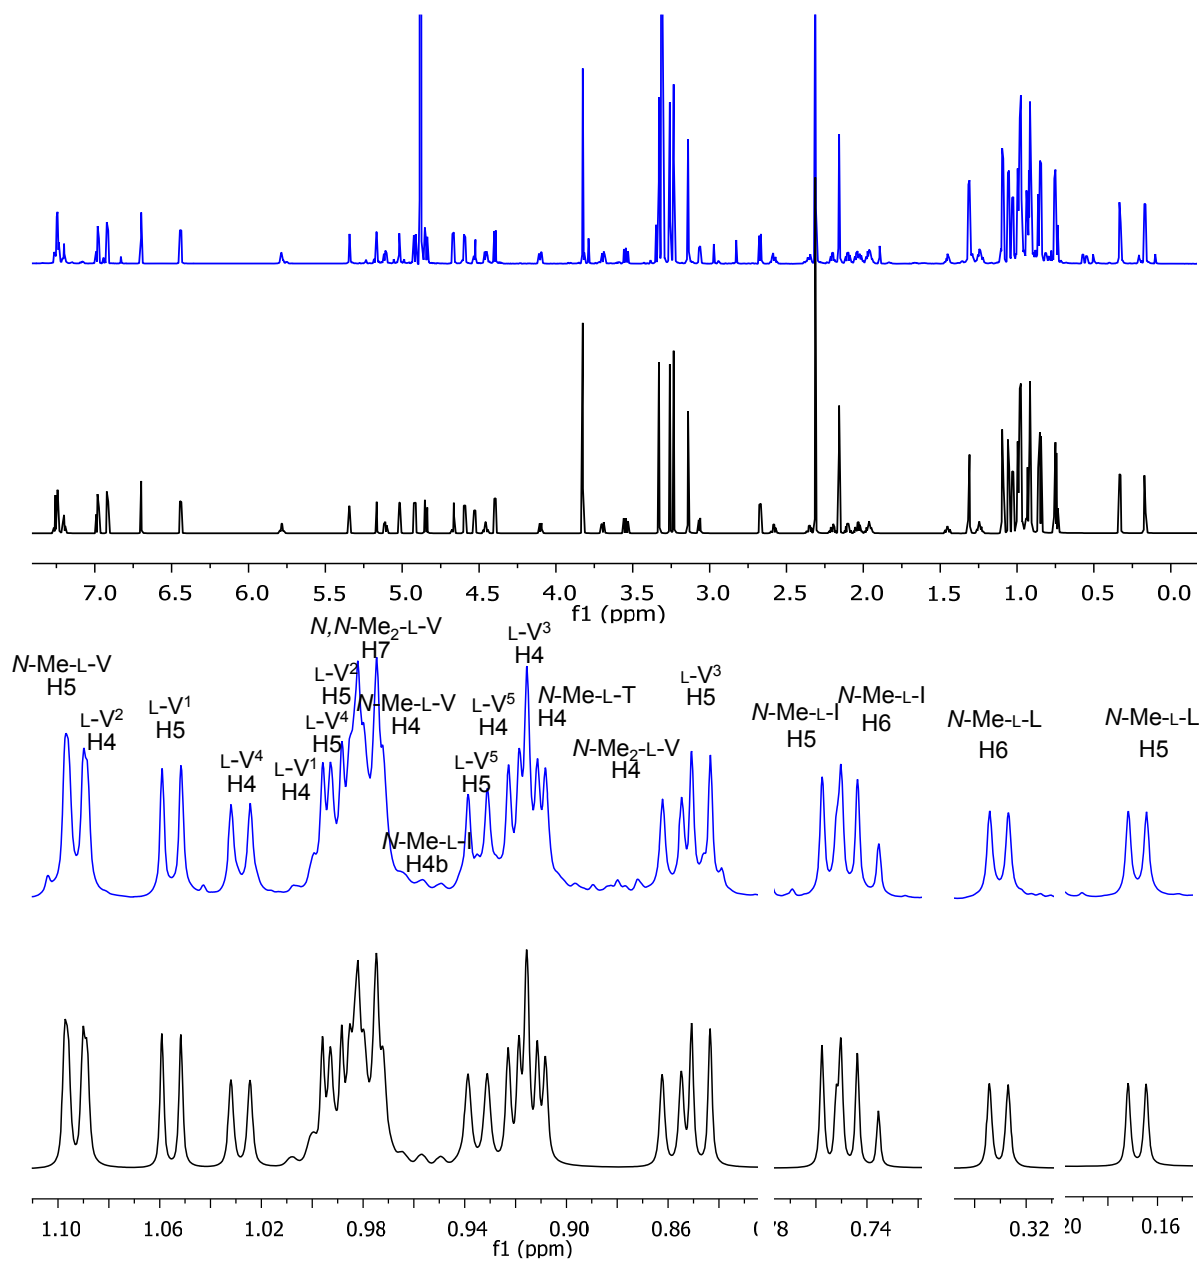

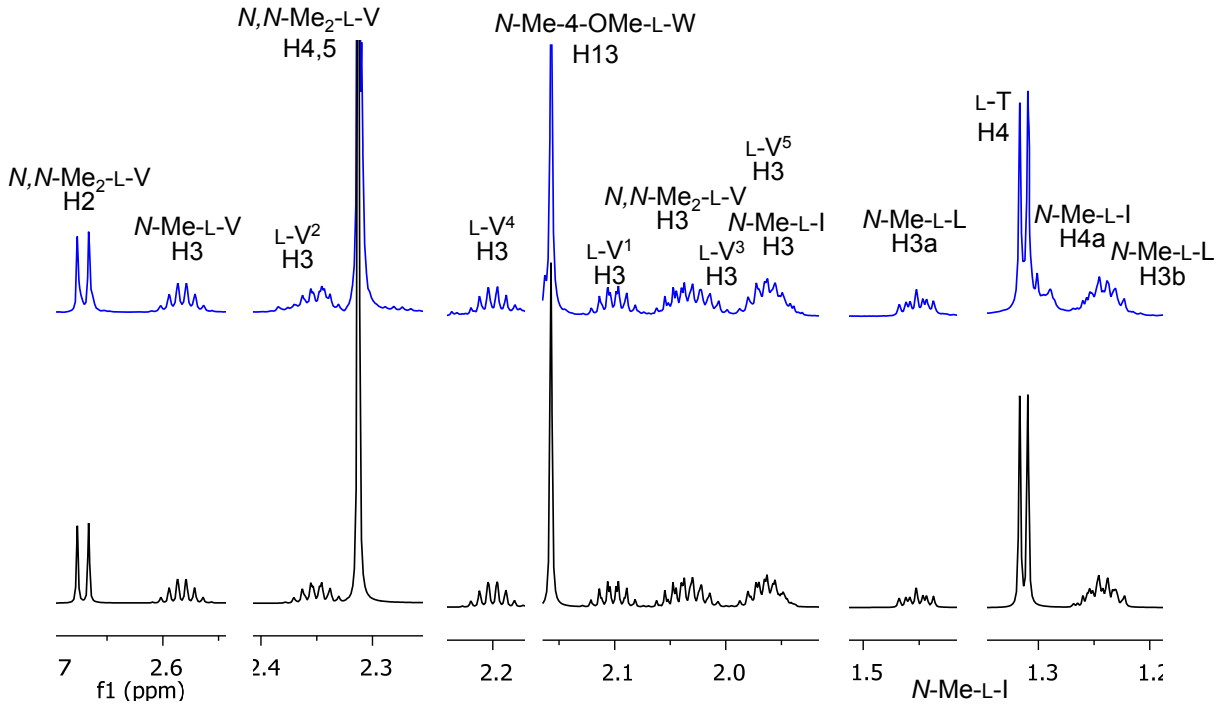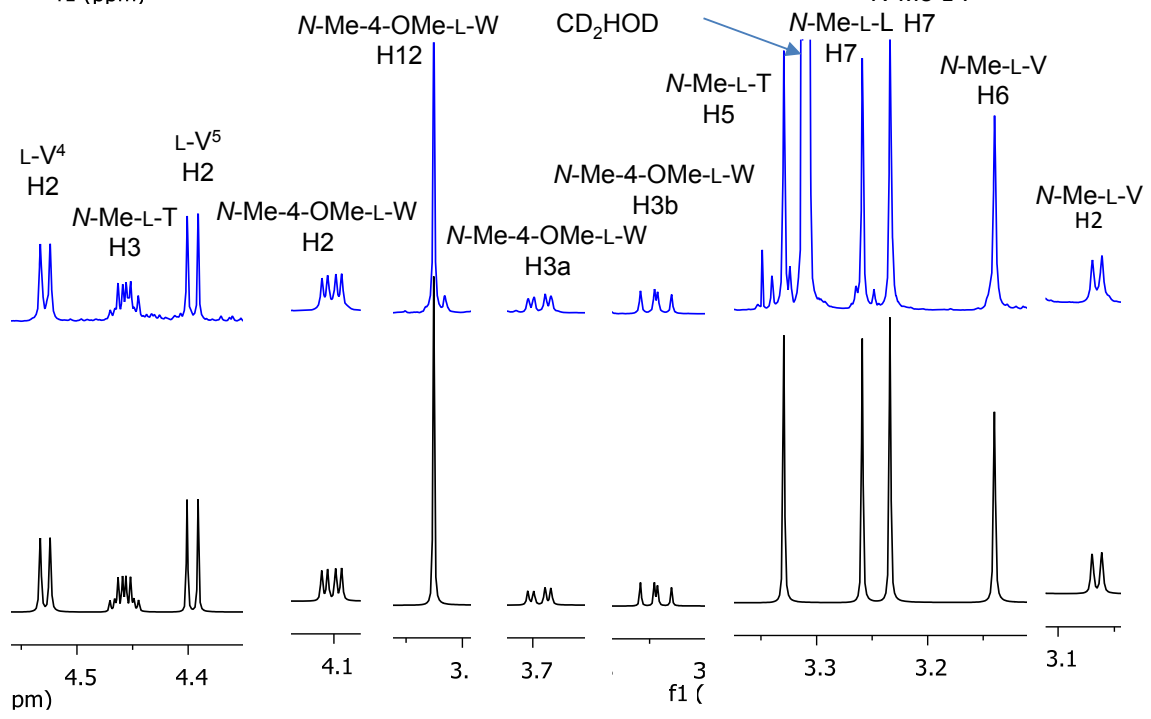



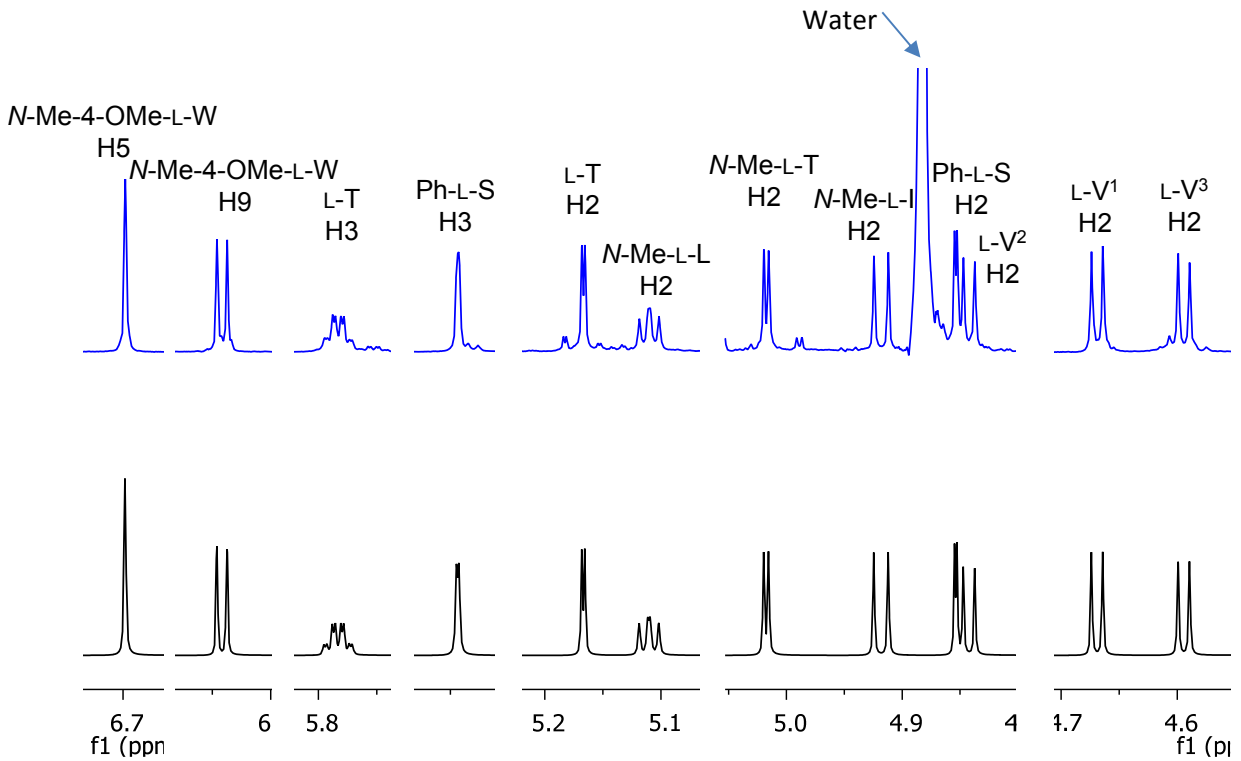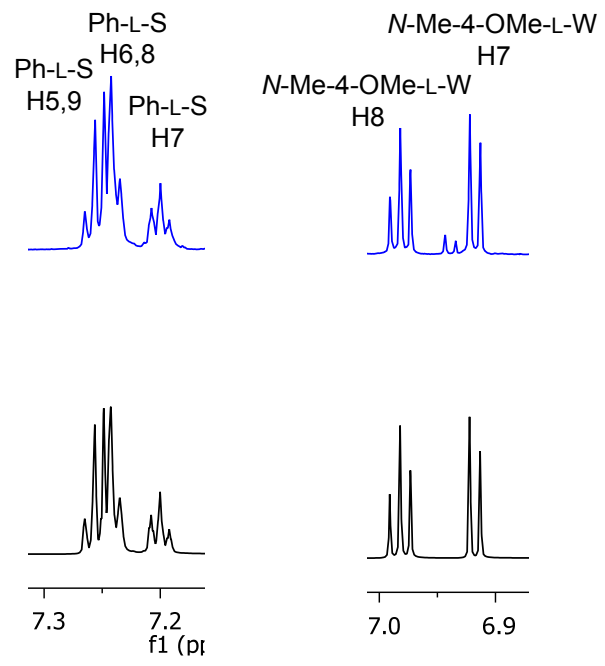

**Supporting Table 1.** Comparison of the final HiFSA-based  $^1\text{H}$  chemical shifts ( $\delta_{\text{H}}$ , in ppm) and multiplicities (Mult.) of ecumicin (1), the chemical shifts of previously reported free amino acids (FAA)<sup>[7]d</sup>, and the PERCH predicted values.

| Amino Acid                       | Position                            | $\delta_{\text{H}}$ (ppm) |       |           | Amino Acid             | Position           | $\delta_{\text{H}}$ (ppm) |       |           |       |
|----------------------------------|-------------------------------------|---------------------------|-------|-----------|------------------------|--------------------|---------------------------|-------|-----------|-------|
|                                  |                                     | HiFSA                     | FAA   | Predicted |                        |                    | HiFSA                     | FAA   | Predicted |       |
| <i>N,N</i> -Me <sub>2</sub> -L-V | 2                                   | 2.672                     | 3.945 | 4.169     | L-V <sup>3</sup>       | 2                  | 4.594                     | 3.945 | 4.489     |       |
|                                  | 3 <sup>a</sup>                      | 2.042                     | 2.358 | 1.952     |                        | 3 <sup>a</sup>     | 2.027                     | 2.358 | 1.995     |       |
|                                  | 4                                   | 0.847                     | 1.041 | 0.509     |                        | 4                  | 0.915                     | 1.066 | 1.060     |       |
|                                  | 5                                   | 0.978                     | 1.066 | 0.818     |                        | 5                  | 0.859                     | 1.041 | 0.999     |       |
|                                  | 6,7 ( <i>N,N</i> -Me <sub>2</sub> ) |                           | 2.313 |           |                        | 2.370              |                           |       |           |       |
| L-V <sup>1</sup>                 | 2                                   | 4.669                     | 3.945 | 4.508     | <i>N</i> -Me-L-V       | 2                  | 3.065                     | 3.945 | 5.153     |       |
|                                  | 3 <sup>a</sup>                      | 2.101                     | 2.358 | 2.155     |                        | 3 <sup>a</sup>     | 2.583                     | 2.358 | 20524     |       |
|                                  | 4                                   | 0.992                     | 1.041 | 1.038     |                        | 4                  | 1.094                     | 1.066 | 1.319     |       |
|                                  | 5                                   | 1.055                     | 1.066 | 0.943     |                        | 5                  | 0.976                     | 1.041 | 1.075     |       |
|                                  |                                     |                           |       |           |                        | 6 ( <i>N</i> -Me)  | 3.140                     |       | 3.160     |       |
| <i>N</i> -Me-L- <i>allo</i> -I   | 2                                   | 4.918                     | 4.022 | 4.617     | <i>N</i> -Me-4-OMe-L-W | 2                  | 4.102                     | 4.384 | 5.043     |       |
|                                  | 3 <sup>a</sup>                      | 1.957                     | 2.065 | 2.032     |                        | 3a                 | 3.545                     | 3.460 | 3.613     |       |
|                                  | 4a <sup>a</sup>                     | 0.989                     | 1.337 | 1.465     |                        | 3b                 | 3.694                     | 3.535 | 3.367     |       |
|                                  | 4b <sup>a</sup>                     | 1.246                     | 1.508 | 1.175     |                        | 5 <sup>b</sup>     | 6.698                     | 7.337 | 6.772     |       |
|                                  | 5                                   | 0.754                     | 0.948 | 0.723     |                        | 7 <sup>c</sup>     | 6.918                     | 7.698 | 7.333     |       |
|                                  | 6                                   | 0.744                     | 0.948 | 0.880     |                        | 8                  | 6.984                     | 7.192 | 7.318     |       |
|                                  | 7 ( <i>N</i> -Me)                   |                           | 3.234 |           |                        | 3.196              | 9                         | 6.442 | 7.278     | 7.089 |
| L-T                              | 2                                   | 5.167                     | 3.989 | 4.668     | 12 ( <i>O</i> -Me)     | 3.826              |                           | 4.072 |           |       |
|                                  | 3                                   | 5.783                     | 4.422 | 4.010     | 13 ( <i>N</i> -Me)     | 2.157              |                           | 2.936 |           |       |
|                                  | 4                                   | 1.313                     | 1.351 | 1.270     |                        |                    |                           |       |           |       |
|                                  |                                     |                           |       |           |                        |                    |                           |       |           |       |
| <i>N</i> -Me-L-T                 | 2                                   | 5.018                     | 3.989 | 4.099     | L-V <sup>4</sup>       | 2                  | 4.529                     | 3.945 | 4.303     |       |
|                                  | 3                                   | 4.457                     | 4.422 | 4.345     |                        | 3 <sup>a</sup>     | 2.200                     | 2.358 | 2.094     |       |
|                                  | 4                                   | 0.912                     | 1.351 | 1.252     |                        | 4                  | 1.028                     | 1.066 | 1.094     |       |
|                                  | 5 ( <i>N</i> -Me)                   |                           | 3.330 |           |                        | 3.257              | 5                         | 0.989 | 1.041     | 1.080 |
|                                  |                                     |                           |       |           |                        |                    |                           |       |           |       |
| L-V <sup>2</sup>                 | 2                                   | 4.842                     | 3.945 | 4.525     | Ph-L- <i>threo</i> -S  | 5 (o) <sup>b</sup> | 7.240                     | 7.332 | 7.524     |       |
|                                  | 3 <sup>a</sup>                      | 2.350                     | 2.358 | 1.975     |                        | 6 (m) <sup>b</sup> | 7.255                     | 7.429 | 7.372     |       |
|                                  | 4                                   | 1.092                     | 1.066 | 0.938     |                        | 7 (p) <sup>b</sup> | 7.201                     | 7.338 | 7.281     |       |
|                                  | 5                                   | 0.979                     | 1.041 | 1.094     |                        | 8 (m) <sup>b</sup> | 7.255                     | 7.429 | 7.372     |       |
|                                  |                                     |                           |       |           |                        | 9 (o) <sup>b</sup> | 7.240                     | 7.332 | 7.526     |       |
| <i>N</i> -Me-L- <i>allo</i> -L   | 2                                   | 5.110                     | 4.061 | 5.342     | L-V <sup>5</sup>       | 2                  | 4.396                     | 3.945 | 4.169     |       |
|                                  | 3a <sup>a</sup>                     | 1.453                     | 1.857 | 1.444     |                        | 3 <sup>a</sup>     | 1.968                     | 2.358 | 1.935     |       |
|                                  | 3b <sup>a</sup>                     | 1.239                     | 1.744 | 1.914     |                        | 4                  | 0.935                     | 1.066 | 1.277     |       |
|                                  | 4 <sup>a</sup>                      | 0.957                     | 1.766 | 1.630     |                        | 5                  | 0.919                     | 1.041 | 0.933     |       |
|                                  | 5                                   | 0.168                     | 0.958 | 0.972     |                        |                    |                           |       |           |       |
|                                  | 6                                   | 0.331                     | 0.970 | 0.972     |                        |                    |                           |       |           |       |
|                                  | 7 ( <i>N</i> -Me)                   |                           | 3.259 |           |                        | 3.110              |                           |       |           |       |

<sup>a</sup> Defined multiplicities are assigned to signals previously reported as multiplets (m).<sup>[4]</sup>

<sup>b</sup> Defined multiplicities are assigned to signals previously reported as singlets (s) or broad singlets (br s).<sup>[4]</sup>

<sup>c</sup> HiFSA reveals the signal previously assigned as a doublet of doublets (dd)<sup>[4]</sup> to be a ddd.

<sup>d</sup> The reported values are based on basic free amino acids with no structural modification, e.g. *N*-methylation.

**Supporting Table 2.** HiFSA-based  $^1\text{H}$ ,  $^1\text{H}$  spin-spin coupling constants ( $J_{\text{HH}}$ , in Hz) of ecumicin (1) compared with the chemical shifts of previously reported free amino acids (FAA)<sup>[7]b</sup>, and the PERCH predicted values.

| Amino acid                       | Coupling                   | $J_{\text{HH}}$ (Hz) |        |           | Amino acid                    | Coupling                       | $J_{\text{HH}}$ (Hz) |        |           |       |
|----------------------------------|----------------------------|----------------------|--------|-----------|-------------------------------|--------------------------------|----------------------|--------|-----------|-------|
|                                  |                            | HiFSA                | FAA    | Predicted |                               |                                | HiFSA                | FAA    | Predicted |       |
| <i>N,N</i> -Me <sub>2</sub> -L-V | $^3J$ (2,3)                | 9.18                 | 4.44   | 12.51     | L-V <sup>3</sup>              | $^3J$ (2,3)                    | 8.88                 | 4.44   | 12.88     |       |
|                                  | $^3J$ (3,4)                | 6.59                 | 7.01   | 6.64      |                               | $^3J$ (3,4)                    | 6.55                 | 7.01   | 6.64      |       |
|                                  | $^3J$ (3,5)                | 6.62                 | 7.02   | 6.64      |                               | $^3J$ (3,5)                    | 6.78                 | 7.02   | 6.64      |       |
| L-V <sup>1</sup>                 | $^3J$ (2,3)                | 8.75                 | 4.44   | 12.6      | <i>N</i> -Me-L-V              | $^3J$ (2,3)                    | 7.62                 | 4.44   | 12.96     |       |
|                                  | $^3J$ (3,4)                | 6.79                 | 7.01   | 6.64      |                               | $^3J$ (3,4)                    | 6.50                 | 7.01   | 6.64      |       |
|                                  | $^3J$ (3,5)                | 6.72                 | 7.02   | 6.64      |                               | $^3J$ (3,5)                    | 6.82                 | 7.02   | 6.64      |       |
| <i>N</i> -Me-L- <i>allo</i> -I   | $^3J$ (2,3)                | 11.23                | 3.92   | 13.15     | <i>N</i> -Me-4-OMe-L-W        | $^3J$ (2,3a)                   | 11.16                | 7.33   | 12.89     |       |
|                                  | $^3J$ (3,4a) <sup>a</sup>  | 1.56                 | 7.00   | 1.95      |                               | $^3J$ (2,3b)                   | 4.71                 | 5.30   | 1.90      |       |
|                                  | $^3J$ (3,4b) <sup>a</sup>  | 3.32                 | 9.00   | 12.66     |                               | $^2J$ (3a,3b)                  | -13.73               | -15.40 | -16.76    |       |
|                                  | $^3J$ (3,6)                | 6.63                 | 5.27   | 6.64      |                               | $^5J$ (5,7) <sup>a</sup>       | 0.48                 | -      | -0.3      |       |
|                                  | $^2J$ (4a,4b) <sup>a</sup> | -12.91               | -13.68 | -13.40    |                               | $^4J$ (7,9) <sup>a</sup>       | 0.67                 | 1.10   | 1.02      |       |
|                                  | $^3J$ (4a,5)               | 7.26                 | 7.40   | 7.44      |                               | $^3J$ (8,9)                    | 7.79                 | 7.02   | 8.10      |       |
|                                  | $^3J$ (4b,5) <sup>a</sup>  | 7.64                 | 7.47   | 7.44      |                               | $^3J$ (7,8)                    | 8.18                 | 8.05   | 7.85      |       |
| L-T                              | $^3J$ (2,3)                | 2.34                 | 3.88   | 2.69      | L-V <sup>4</sup>              | $^3J$ (2,3)                    | 7.91                 | 4.44   | 3.45      |       |
|                                  | $^3J$ (3,4)                | 6.51                 | 6.64   | 6.25      |                               | $^3J$ (3,4)                    | 6.75                 | 7.01   | 6.64      |       |
|                                  |                            |                      |        |           |                               | $^3J$ (3,5)                    | 6.81                 | 7.02   | 6.64      |       |
| <i>N</i> -Me-L-T                 | $^3J$ (2,3)                | 3.73                 | 3.88   | 2.44      |                               | $^3J$ (2,3)                    | 1.90                 |        | 1.90      |       |
|                                  | $^3J$ (3,4)                | 6.46                 | 6.64   | 6.25      |                               | $^4J$ [5(o),9(o)] <sup>a</sup> | 1.33                 | 2.06   | 1.98      |       |
| L-V <sup>2</sup>                 | $^3J$ (2,3)                | 8.92                 | 4.44   | 2.98      | <i>Ph</i> -L- <i>threo</i> -S | $^3J$ [5(o),6(m)] <sup>a</sup> | 7.65                 | 7.69   | 7.66      |       |
|                                  | $^3J$ (3,4)                | 6.69                 | 7.01   | 6.64      |                               | $^3J$ [8(m),9(o)] <sup>a</sup> | 7.65                 | 7.69   | 7.66      |       |
|                                  | $^3J$ (3,5)                | 7.01                 | 7.02   | 6.64      |                               | $^5J$ [5(o),8(m)] <sup>a</sup> | 0.76                 | 0.59   | 0.55      |       |
| <i>N</i> -Me-L-L                 | $^3J$ (2,3a)               | 8.58                 | 8.36   | 3.04      |                               | $^5J$ [6(m),9(o)] <sup>a</sup> | 0.76                 | 0.59   | 0.55      |       |
|                                  | $^3J$ (2,3b)               | 6.59                 | 5.84   | 13.95     |                               | $^4J$ [5(o),7(p)] <sup>a</sup> | 1.25                 | 1.25   | 1.26      |       |
|                                  | $^2J$ (3a,3b) <sup>a</sup> | -13.56               | -14.40 | -14.71    |                               | $^4J$ [7(p),9(o)] <sup>a</sup> | 1.25                 | 1.25   | 1.26      |       |
|                                  | $^3J$ (3a,4) <sup>a</sup>  | 5.44                 | 6.31   | 12.99     |                               | $^4J$ [6(m),8(m)] <sup>a</sup> | 1.71                 | 1.41   | 1.48      |       |
|                                  | $^3J$ (3b,4) <sup>a</sup>  | 7.99                 | 8.27   | 2.27      |                               | $^3J$ [6(m),7(p)] <sup>a</sup> | 7.47                 | 7.524  | 7.40      |       |
|                                  | $^3J$ (4,5)                | 6.55                 | 6.50   | 6.64      |                               | $^3J$ [7(p),8(m)] <sup>a</sup> | 7.47                 | 7.524  | 7.40      |       |
|                                  | $^3J$ (4,6)                | 6.59                 | 6.62   | 6.64      |                               | L-V <sup>5</sup>               | $^3J$ (2,3)          | 8.90   | 4.44      | 12.32 |
|                                  |                            |                      |        |           |                               |                                | $^3J$ (3,4)          | 6.83   | 7.01      | 6.64  |
|                                  |                            |                      |        |           | $^3J$ (3,5)                   | 6.41                           | 7.02                 | 6.64   |           |       |

<sup>a</sup> Scalar coupling constants that were not reported previously due to extensive resonance overlap.<sup>[4]</sup>

<sup>b</sup> The reported values are based on basic free amino acids with no structural modification, e.g. *N*-methylation.
